# Supplementary material for: Characterization of the mean and extreme Mediterranean cyclones and their variability during the period 1500 BCE to 1850 CE
Source: Copernicus journal article supplement (doi:10.5194/egusphere-2024-2731), 2024-09-26
Supplement: Supplementary file 1 [file egusphere-2024-2731-supplement.pdf]

**Table S1.** Pearson correlation coefficients between the 30-year running average time series of Fig. 4.

|                                       | T850 anomalies | Cyclone frequency | Maximum cyclone-related precipitation | Maximum cyclone-related wind speed |
|---------------------------------------|----------------|-------------------|---------------------------------------|------------------------------------|
| T850 anomalies                        | x              | -0.088            | 0.098                                 | -0.224                             |
| Cyclone frequency                     | x              | x                 | 0.217                                 | 0.135                              |
| Maximum cyclone-related precipitation | x              | x                 | x                                     | 0.592                              |
| Maximum cyclone-related wind speed    | x              | x                 | x                                     | x                                  |

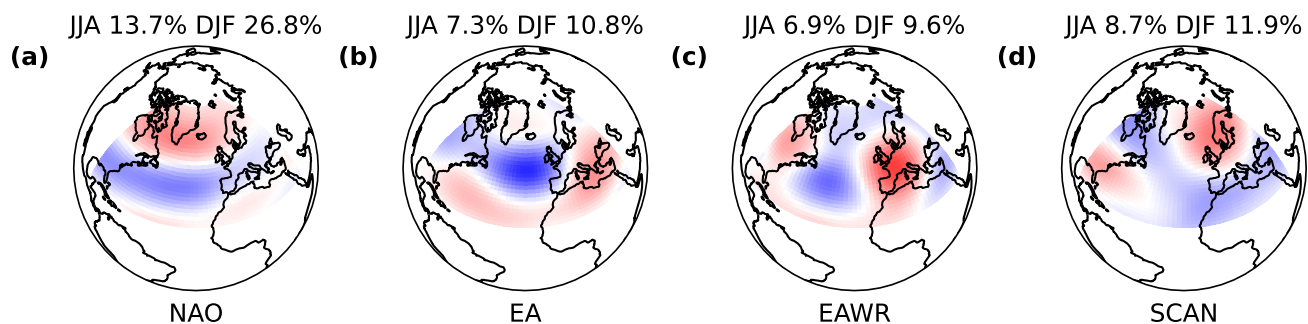

**Figure S1.** Shapes of EOFs that were used to compute the PCS that were correlated with cyclone frequency, cyclone-related precipitation and cyclone-related wind speed in Fig. 6 and S2. (a) is the EOF for the NAO, (b) the EA, (c) the EAWR and (d) the SCAN pattern.

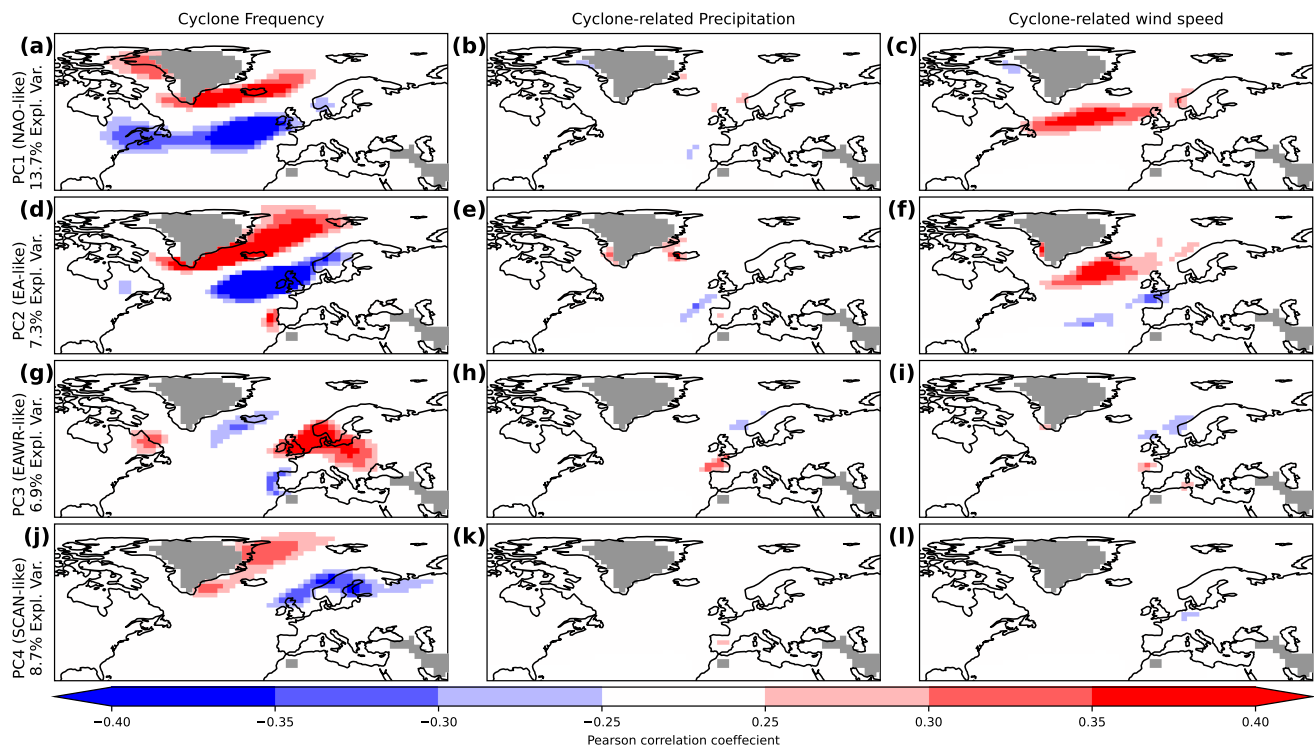

**Figure S2.** Same as Fig. 6, but now for JJA.

**Table S2.** Number of overlapping EXCs that are present in two or more extremeness rankings.

|                 | Overlap<br>wind speed and<br>precipitation EXCs | Overlap<br>wind speed and<br>compound EXCs | Overlap<br>precipitation and<br>compound EXCs |
|-----------------|-------------------------------------------------|--------------------------------------------|-----------------------------------------------|
| EXC10<br>CMED   | 0                                               | 2                                          | 5                                             |
| EXC100<br>CMED  | 8                                               | 45                                         | 45                                            |
| EXC1000<br>CMED | 256                                             | 548                                        | 469                                           |
| EXC10<br>EMED   | 0                                               | 3                                          | 3                                             |
| EXC100<br>EMED  | 14                                              | 52                                         | 49                                            |
| EXC1000<br>EMD  | 295                                             | 584                                        | 602                                           |

# 100 most extreme cyclones in the Mediterranean JJA

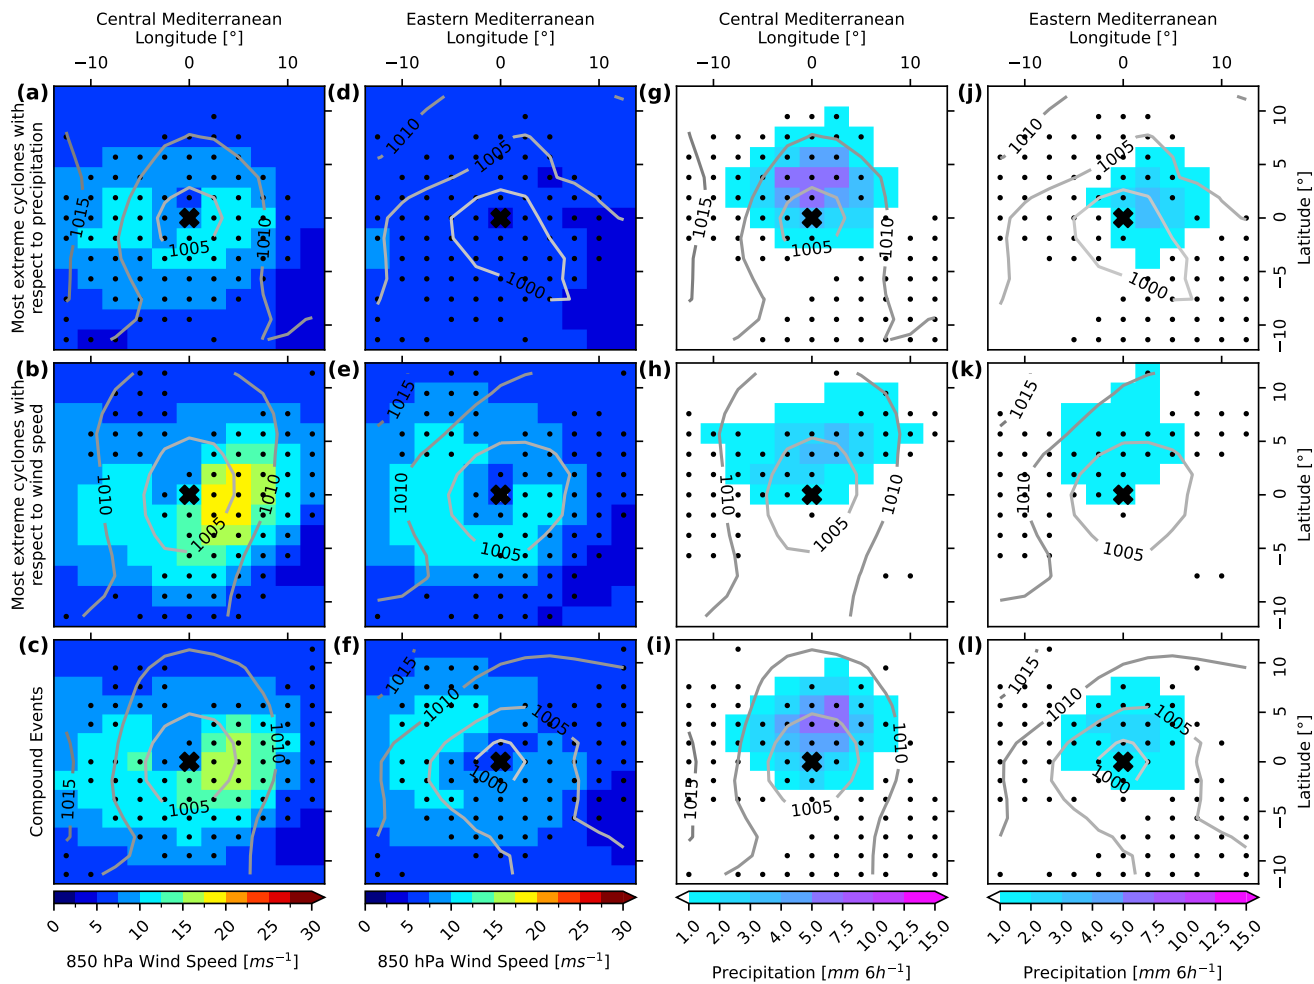

Figure S3. Same as Fig. 7, but now for JJA.

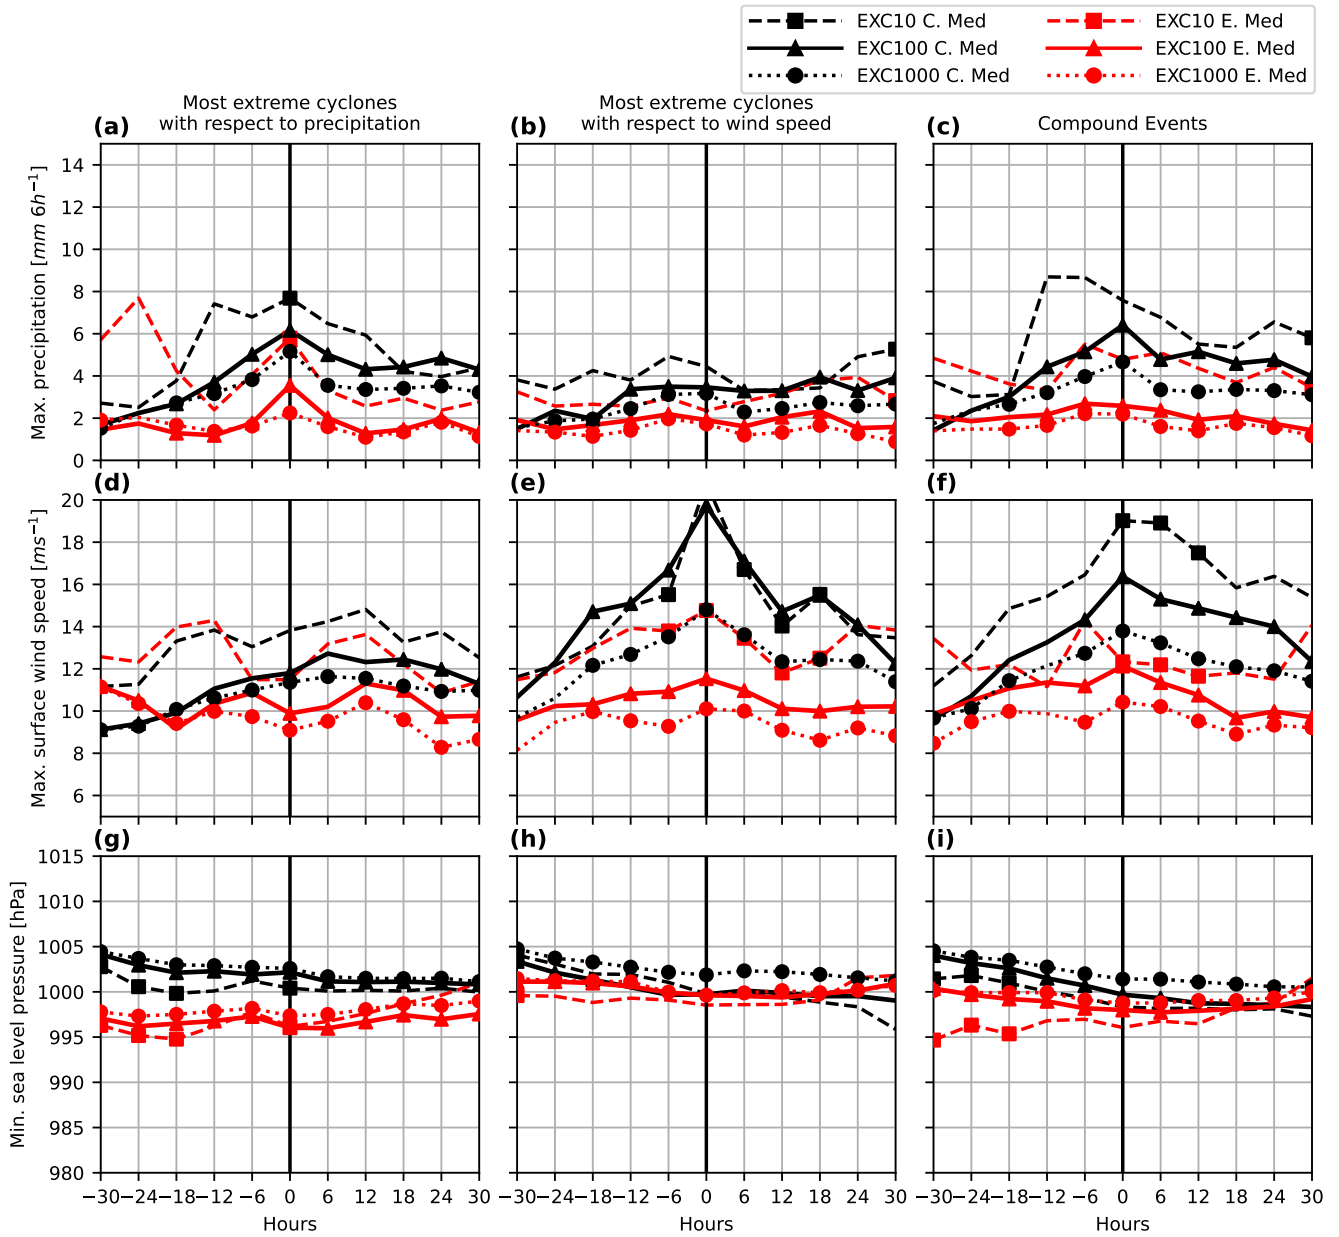

**Figure S4.** Same as Fig. 8, but now for JJA.

# 100 most extreme cyclones in the Mediterranean JJA

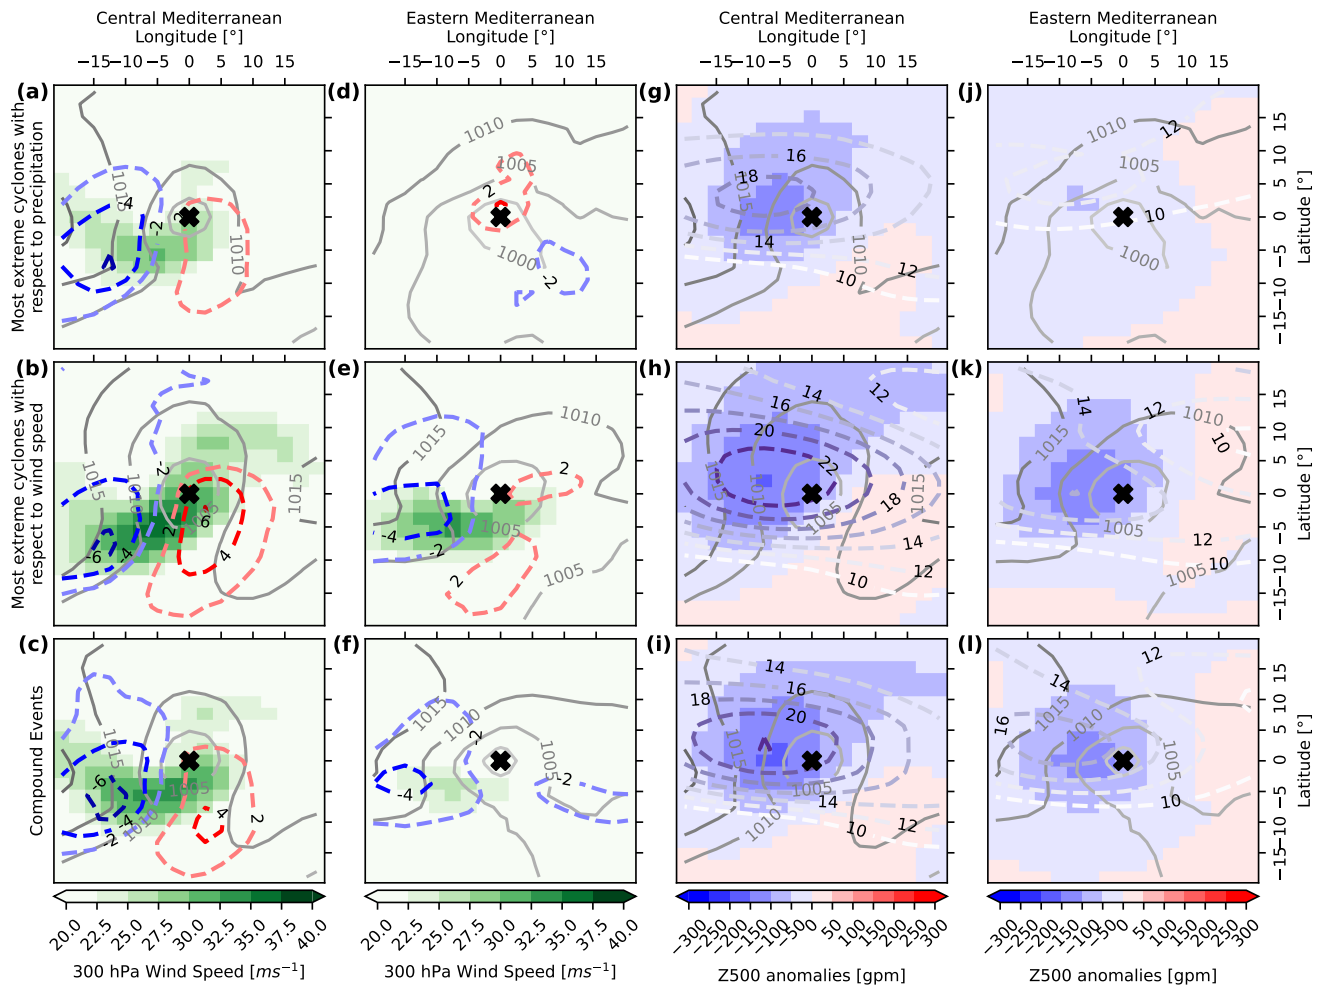

**Figure S5.** Same as Fig. 9, but now for JJA. Please note that the colorbar for the 300 hPa wind speed is different here compared to Fig. 9.

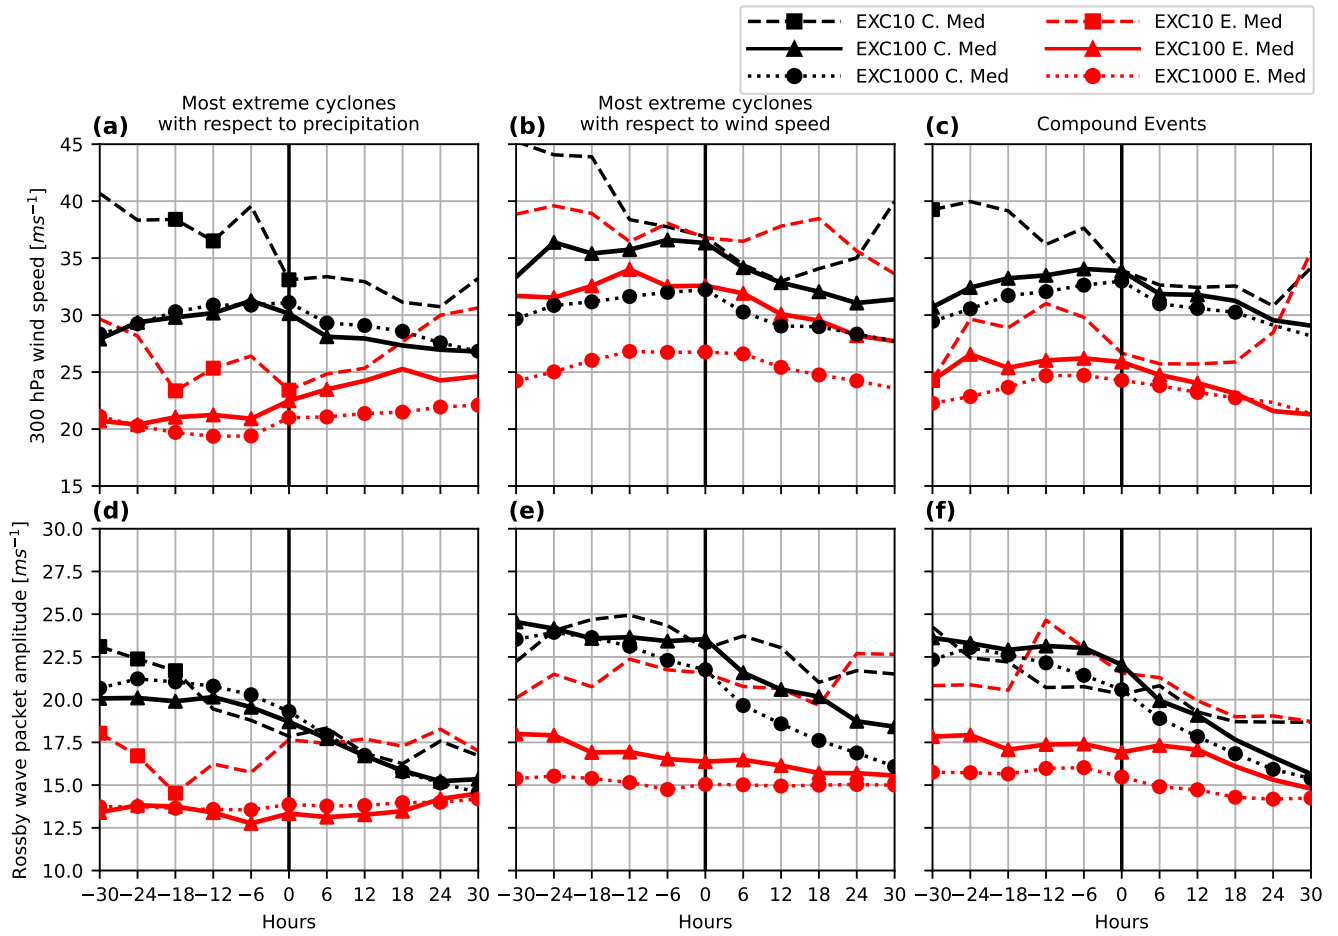

Figure S6. Same as Fig. 10, but now for JJA.
